# Supplementary material
Source: PubMed Central journal article supplement (PMC4174942)
Supplement: 5b044ebe265824e82fa9631f43db93b7_genetics.114.161968-6.pdf [file 5b044ebe265824e82fa9631f43db93b7_genetics.114.161968-6.pdf]

**Table S1 A priori identified Candidate Genes**

| <b>Carboplatin</b> |                                 |                                  |                                |                                                              |
|--------------------|---------------------------------|----------------------------------|--------------------------------|--------------------------------------------------------------|
| <b>Human Gene</b>  | <b>Polymorphism<sup>1</sup></b> | <b>Ortholog Type<sup>2</sup></b> | <b>Fly Gene(s)<sup>2</sup></b> | <b>References</b>                                            |
| ALDH1A1            | A1*2                            | 1:Many                           | Aldh-III                       | Ekhart <i>et al.</i> 2008                                    |
| ALDH3A1            | A1*2                            | Possible                         | CG31075                        | Ekhart, <i>et al.</i> 2008                                   |
| ERCC1              | C8092A                          | 1:1                              | Ercc1                          | Li <i>et al.</i> 2010                                        |
|                    | T118C                           |                                  |                                | Li <i>et al.</i> 2010; Steffensen <i>et al.</i> 2009         |
| ERCC2              | A35931C                         | 1:1                              | Xpd                            | Li <i>et al.</i> 2010                                        |
| GSTp1              | A342G                           | No Ortholog                      |                                | Sun <i>et al.</i> 2010                                       |
| hMSH2              | T6C                             | 1:1                              | spel1                          | Cheng <i>et al.</i> 2010                                     |
| hMLH1              | T1151A                          | 1:1                              | Mlh1                           | Cheng <i>et al.</i> 2010                                     |
| MRP2               | C24T                            | Possible                         | DI                             | Sun <i>et al.</i> 2010                                       |
| SLC31A1            | Pathway                         | 1:1                              | Ctr1A                          | Marsh <i>et al.</i> 2009                                     |
| ABCG2              | Pathway                         | Possible                         | bw                             | Marsh <i>et al.</i> 2009                                     |
|                    |                                 | Possible                         | st                             |                                                              |
|                    |                                 | Possible                         | w                              |                                                              |
| ABCC2              | Pathway                         | 1:Many                           | MRP                            | Marsh <i>et al.</i> 2009                                     |
| MT1A               | Pathway                         | No Ortholog                      |                                | Marsh <i>et al.</i> 2009                                     |
| MPO                | Pathway                         | Possible                         | Pxd                            | Marsh <i>et al.</i> 2009                                     |
|                    |                                 | Possible                         | CG10211                        |                                                              |
|                    |                                 | Possible                         | Irc                            |                                                              |
|                    |                                 | Possible                         | CG4009                         |                                                              |
|                    |                                 | Possible                         | CG5873                         |                                                              |
|                    |                                 | Possible                         | CG6969                         |                                                              |
|                    |                                 | Possible                         | CG42331                        |                                                              |
|                    |                                 | Possible                         | Pxt                            |                                                              |
| GSPT1              | Pathway                         | No Ortholog                      |                                | Marsh <i>et al.</i> 2009                                     |
| NQO1               | Pathway                         | No Ortholog                      |                                | Marsh <i>et al.</i> 2009                                     |
| GSTT1              | Pathway                         | Many:Many                        | CG1681                         | Marsh <i>et al.</i> 2009                                     |
|                    |                                 | Many:Many                        | CG1702                         |                                                              |
|                    |                                 | Many:Many                        | CG30000                        |                                                              |
|                    |                                 | Many:Many                        | CG30005                        |                                                              |
|                    |                                 | Possible                         | CG16936                        |                                                              |
|                    |                                 | Possible                         | CG11784                        |                                                              |
|                    |                                 | Possible                         | CG4688                         |                                                              |
|                    |                                 | Possible                         | CG5224                         |                                                              |
|                    |                                 | Possible                         | CG17639                        |                                                              |
|                    |                                 | Possible                         | gfzf                           |                                                              |
|                    |                                 | Function                         | GstD1-10 <sup>3</sup>          |                                                              |
|                    |                                 | Function                         | GstE1-10 <sup>3</sup>          |                                                              |
| MT2A               | Pathway                         | No Ortholog                      |                                | Marsh <i>et al.</i> 2009                                     |
| SOD1               | Pathway                         | No Ortholog                      |                                | Marsh <i>et al.</i> 2009                                     |
| GSTM1              | Pathway                         | No Ortholog                      |                                | Marsh <i>et al.</i> 2009                                     |
| ATP7A              | Pathway                         | 1:Many                           | ATP7                           | Marsh <i>et al.</i> 2009                                     |
| ATP7B              | Pathway                         | 1:Many                           | ATP7                           | Marsh <i>et al.</i> 2009                                     |
| HMGB1              | Pathway                         | No Ortholog                      |                                | Marsh <i>et al.</i> 2009                                     |
| POLH               | Pathway                         | 1:1                              | DNApol-eta                     | Marsh <i>et al.</i> 2009                                     |
| POLM               | Pathway                         | No Ortholog                      |                                | Marsh <i>et al.</i> 2009                                     |
| POLB               | Pathway                         | NoOrtholog                       |                                | Marsh <i>et al.</i> 2009                                     |
| REV3L              | Pathway                         | 1:Many                           | Mus205                         | Marsh <i>et al.</i> 2009                                     |
| MSH2               | Pathway                         | 1:1                              | spel1                          | Marsh <i>et al.</i> 2009                                     |
| MLH1               | Pathway                         | 1:1                              | Mlh1                           | Marsh <i>et al.</i> 2009                                     |
| MSH6               | Pathway                         | 1:1                              | Msh6                           | Marsh <i>et al.</i> 2009                                     |
| PMS2               | Pathway                         | 1:1                              | Pms2                           | Marsh <i>et al.</i> 2009                                     |
| ERCC1              | Pathway                         | 1:1                              | Ercc1                          | Marsh <i>et al.</i> 2009                                     |
| ERCC2              | Pathway                         | 1:1                              | Xpd                            | Marsh <i>et al.</i> 2009                                     |
| ERCC3              | Pathway                         | 1:1                              | Hay                            | Marsh <i>et al.</i> 2009                                     |
| ERCC4              | Pathway                         | 1:1                              | Mei-9                          | Marsh <i>et al.</i> 2009                                     |
| ERCC6              | Pathway                         | No Ortholog                      |                                | Marsh <i>et al.</i> 2009                                     |
| XRCC1              | Pathway                         | 1:Many                           | XRCC1                          | Marsh <i>et al.</i> 2009, Gurubhagavatula <i>et al.</i> 2004 |
| XPA                | Pathway                         | 1:1                              | Xpac                           | Marsh <i>et al.</i> 2009                                     |
| SNF                | Pathway                         | 1:1                              | CG8485                         | Marsh <i>et al.</i> 2009                                     |
| SWI                | Pathway                         | 1:Many                           | Iswi                           | Marsh <i>et al.</i> 2009                                     |
| <b>Gemcitabine</b> |                                 |                                  |                                |                                                              |
| <b>Human Gene</b>  | <b>Polymorphism<sup>1</sup></b> | <b>Ortholog Type<sup>2</sup></b> | <b>Fly Gene(s)<sup>2</sup></b> | <b>References</b>                                            |
| CDA                | A76C                            | 1:Many                           | CG8353                         | Tanaka <i>et al.</i> 2010                                    |

|         |                               |                        |                  |                                                                                                                                                                                                     |
|---------|-------------------------------|------------------------|------------------|-----------------------------------------------------------------------------------------------------------------------------------------------------------------------------------------------------|
|         | A79C                          |                        | CG8349           | Metharom <i>et al.</i> 2011;<br>Maring <i>et al.</i> 2010 ; Xu <i>et al.</i> 2012<br>Sugiyama <i>et al.</i> 2009;<br>Yonemori <i>et al.</i> 2005;<br>Ueno <i>et al.</i> 2009; Xu <i>et al.</i> 2012 |
|         | G208A                         |                        |                  | Tanaka <i>et al.</i> 2010<br>Si <i>et al.</i> 2011                                                                                                                                                  |
| dCK     | C(-1205)T<br>A9846G           | 1:Many                 | dnk              | Tanaka <i>et al.</i> 2010<br>Gusella <i>et al.</i> 2011                                                                                                                                             |
| hCNT1   | G565A                         | Many:Many              | CG8083<br>CNT1   | Tanaka <i>et al.</i> 2010<br>Tanaka <i>et al.</i> 2010<br>Gusella <i>et al.</i> 2010                                                                                                                |
| hENT1   | A(-201)G<br>C913T<br>G(-706)C | 1:Many<br>Possible     | Ent1<br>Ent2     | Tanaka <i>et al.</i> 2010<br>Tanaka <i>et al.</i> 2010<br>Gusella <i>et al.</i> 2010                                                                                                                |
| MRP2    | G40A                          | Possible               | DI               | Tanaka <i>et al.</i> 2011                                                                                                                                                                           |
| MTHFR   | C677T                         | No Ortholog            |                  | Alberola <i>et al.</i> 2004; Hong 2013                                                                                                                                                              |
| RRM1    | A33G                          | 1:1                    | RnrL             | Tanaka <i>et al.</i> 2010                                                                                                                                                                           |
| SMYD3   | Knock-down                    | 1:Many                 | Bzd              | Kalari <i>et al.</i> 2010                                                                                                                                                                           |
| SLC29A1 | Pathway                       | 1:Many<br>Possible     | Ent1<br>Ent2     | Whirl-Carrillo <i>et al.</i> 2012                                                                                                                                                                   |
| SLC28A1 | Pathway                       | Many:Many<br>Many:Many | CG8083<br>CNT1   | Whirl-Carrillo <i>et al.</i> 2012                                                                                                                                                                   |
| SLC28A3 | Pathway                       | Many:Many<br>Many:Many | CG8083<br>CNT1   | Whirl-Carrillo <i>et al.</i> 2012                                                                                                                                                                   |
| CDA     | Pathway                       | 1:Many                 | CG8353<br>CG8349 | Whirl-Carrillo <i>et al.</i> 2012                                                                                                                                                                   |
| dCK     | Pathway                       | 1:Many                 | dnk              | Whirl-Carrillo <i>et al.</i> 2012                                                                                                                                                                   |
| NT5C    | Pathway                       | No Ortholog            |                  | Whirl-Carrillo <i>et al.</i> 2012                                                                                                                                                                   |
| CMPK1   | Pathway                       | 1:1                    | Dak1             | Whirl-Carrillo <i>et al.</i> 2012                                                                                                                                                                   |
| RRM1    | Pathway                       | 1:1                    | RnrL             | Whirl-Carrillo <i>et al.</i> 2012, Kwon <i>et al.</i> 2006                                                                                                                                          |
| RRM2    | Pathway                       | 1:Many                 | RnrS             | Whirl-Carrillo <i>et al.</i> 2012                                                                                                                                                                   |
| RRM2B   | Pathway                       | 1:Many                 | RnrS             | Whirl-Carrillo <i>et al.</i> 2012                                                                                                                                                                   |

| <b>Mitomycin C</b> |                                 |                                  |                                |                                                      |
|--------------------|---------------------------------|----------------------------------|--------------------------------|------------------------------------------------------|
| <b>Human Gene</b>  | <b>Polymorphism<sup>1</sup></b> | <b>Ortholog Type<sup>2</sup></b> | <b>Fly Gene(s)<sup>2</sup></b> | <b>References</b>                                    |
| FANCL              | Pathway                         | 1:1                              | Fancl                          | Zhang <i>et al.</i> 2006                             |
| FANCD2             | Pathway                         | 1:1                              | Fancd2                         | Roques <i>et al.</i> 2009, Ho <i>et al.</i> 2006     |
| Rad51              | Pathway                         | 1:1                              | spn-A                          | Ko <i>et al.</i> 2011                                |
| Mre11A             | Pathway                         | 1:1                              | Mre11                          | Roques <i>et al.</i> 2009                            |
| Rad50              | Pathway                         | 1:1                              | rad50                          | Roques <i>et al.</i> 2009,<br>Kim <i>et al.</i> 2002 |
| Nibrin             | Pathway                         | 1:1                              | nbs                            | Roques <i>et al.</i> 2009                            |
| CHK1               | Pathway                         | 1:1                              | grp                            | Boamah <i>et al.</i> 2010                            |

1. Polymorphism refers either to a SNP within a gene (SNP resulting in amino acid substitution given) or "pathway" indicates that the gene is in the drug's cellular pathway based on the literature (but that gene does not harbor a germ-line SNP impacting toxicity).
2. Ortholog types and gene names are represented as on the ensembl.org genome browser (Birney *et al.* 2004)
3. Gene family. The orthology prediction is based on both human and fly GST gene families having the same apparent biochemical function
