# Supplementary material
Source: PubMed Central journal article supplement (PMC4174942)
Supplement: 6e39e15fc48afa22f1d124217d1f2b3f_genetics.114.161968-8.pdf [file 6e39e15fc48afa22f1d124217d1f2b3f_genetics.114.161968-8.pdf]

**Table S4 Biallelic SNPs with p-values less than 0.01 for both gemcitabine toxicity and methotrexate toxicity within the GB1 candidate gene region (see Table S2).**

| chr | base    | GEM<br>%V <sub>T</sub> | MTX<br>%V <sub>T</sub> | GEM<br>P | MTX<br>P | GEM<br>%V <sub>G</sub> | MTX<br>%V <sub>G</sub> | GEM<br>MAF | MTX<br>MAF |
|-----|---------|------------------------|------------------------|----------|----------|------------------------|------------------------|------------|------------|
| 3L  | 3325388 | 1.8                    | 2.3                    | 0.007    | 0.008    | 2.8                    | 3.5                    | 6.7        | 7.1        |
| 3L  | 3326092 | 3.0                    | 2.3                    | 0.0005   | 0.008    | 4.7                    | 3.6                    | 40.0       | 57.1       |
| 3L  | 3326126 | 4.3                    | 2.2                    | 2.6E-05  | 0.01     | 6.8                    | 3.4                    | 26.7       | 28.5       |
| 3L  | 3326147 | 1.8                    | 2.3                    | 0.007    | 0.008    | 2.8                    | 3.5                    | 6.7        | 7.1        |
| 3L  | 3326157 | 1.8                    | 2.3                    | 0.007    | 0.008    | 2.8                    | 3.5                    | 6.7        | 7.1        |
| 3L  | 3326171 | 2.0                    | 2.9                    | 0.004    | 0.003    | 3.2                    | 4.5                    | 20.0       | 21.4       |
| 3L  | 3326188 | 2.0                    | 2.9                    | 0.004    | 0.003    | 3.2                    | 4.5                    | 20.0       | 21.4       |
| 3L  | 3326189 | 2.0                    | 2.9                    | 0.004    | 0.003    | 3.2                    | 4.5                    | 20.0       | 21.4       |
| 3L  | 3326419 | 1.8                    | 2.3                    | 0.007    | 0.008    | 2.8                    | 3.5                    | 6.7        | 7.1        |
| 3L  | 3326597 | 1.8                    | 2.3                    | 0.007    | 0.008    | 2.8                    | 3.5                    | 6.7        | 7.1        |
| 3L  | 3326672 | 1.8                    | 2.3                    | 0.007    | 0.008    | 2.8                    | 3.5                    | 6.7        | 7.1        |
| 3L  | 3326690 | 1.8                    | 2.3                    | 0.007    | 0.008    | 2.8                    | 3.5                    | 6.7        | 7.1        |
| 3L  | 3326933 | 1.8                    | 2.9                    | 0.006    | 0.003    | 2.9                    | 4.6                    | 20.0       | 21.4       |
| 3L  | 3327091 | 1.7                    | 2.5                    | 0.009    | 0.006    | 2.7                    | 3.8                    | 40.0       | 50.0       |
| 3L  | 3329269 | 1.8                    | 2.3                    | 0.007    | 0.008    | 2.8                    | 3.6                    | 6.7        | 7.1        |
| 3L  | 3329532 | 1.6                    | 2.3                    | 0.010    | 0.008    | 2.6                    | 3.6                    | 6.7        | 7.1        |

Note: chr=chromosome, base=base position in chromosome, GEM = gemcitabine, MTX = methotrexate, %V<sub>T</sub>=percent of total variation explained by SNP, P=p-value, %V<sub>G</sub>=percent of genetic variation explained by SNP, MAF = minor allele frequency= number of founder chromosomes having minor allele represented at this position/total number of founder chromosomes. Shaded rows are SNPs with p-values less than 0.001 for gemcitabine toxicity.
