# Supplementary material
Source: PubMed Central journal article supplement (PMC4174942)
Supplement: 20aae4a21ed494a739d02eb59422417a_genetics.114.161968-1.pdf [file 20aae4a21ed494a739d02eb59422417a_genetics.114.161968-1.pdf]

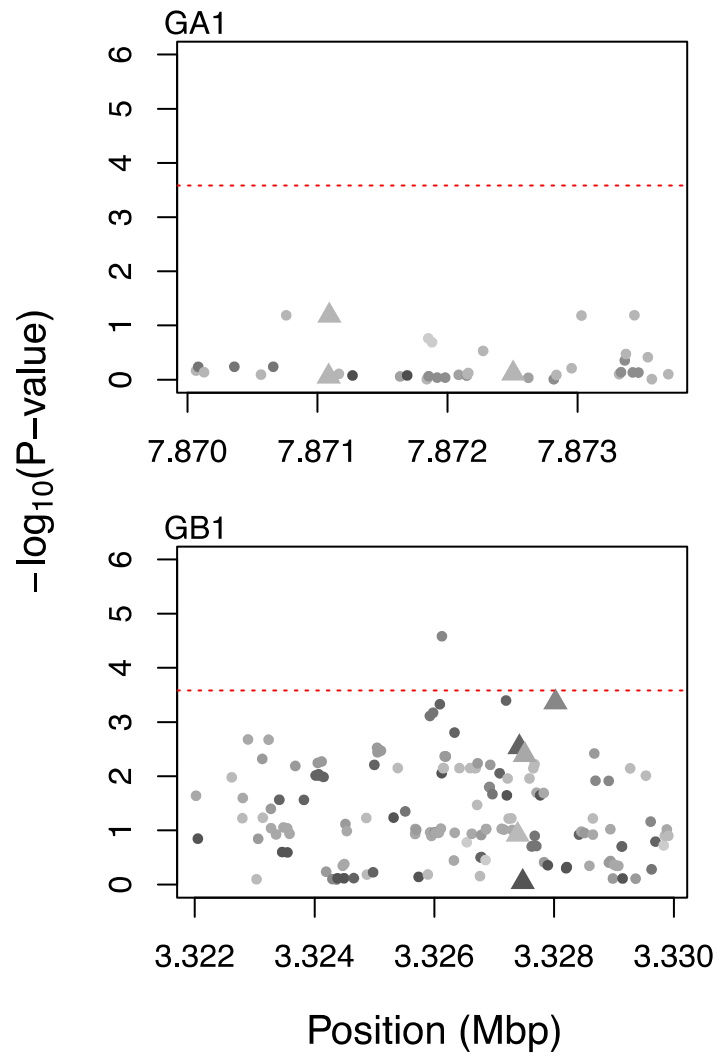

**Figure S4** Association scans with gemcitabine toxicity for all SNPs in candidate genes listed in Table S2. Red threshold is the Bonferroni over all candidate gene regions for gemcitabine. Symbols are shaded by the minor allele frequency in the founders such that darker circles are more common SNPs. Triangles are nsSNPs.
