# Supplementary material
Source: PubMed Central journal article supplement (PMC4174942)
Supplement: 6412e85760b274be1284c13f808608f9_genetics.114.161968-2.pdf [file 6412e85760b274be1284c13f808608f9_genetics.114.161968-2.pdf]

**Table S3 Biallelic SNPs significant after Bonferroni correction from gene-centric association scans.**

| QTL | chr | base     | %V <sub>T</sub> | P       | %V <sub>G</sub> | MiAC | MaAC |
|-----|-----|----------|-----------------|---------|-----------------|------|------|
| CA1 | X   | 14495288 | 10.3            | 7.9E-06 | 15.2            | 4    | 5    |
| CB1 | 2L  | 12715263 | 9.1             | 2.7E-05 | 13.5            | 3    | 4    |
| CB1 | 2L  | 12718169 | 9.5             | 1.9E-05 | 13.9            | 3    | 4    |
| CB1 | 2L  | 12730194 | 9.5             | 2.0E-05 | 13.9            | 3    | 3    |
| CB1 | 2L  | 12730331 | 9.1             | 2.9E-05 | 13.3            | 3    | 3    |
| CB1 | 2L  | 12730336 | 9.1             | 2.9E-05 | 13.3            | 3    | 3    |
| CB1 | 2L  | 12730358 | 9.1             | 2.9E-05 | 13.4            | 3    | 3    |
| CB1 | 2L  | 12737838 | 9.0             | 3.2E-05 | 13.2            | 2    | 4    |
| CB1 | 2L  | 12738050 | 9.0             | 3.1E-05 | 13.3            | 2    | 4    |
| CB1 | 2L  | 12738104 | 9.0             | 3.3E-05 | 13.2            | 2    | 4    |
| GB1 | 3L  | 3326126  | 4.3             | 2.6E-5  | 6.8             | 4    | 11   |

Note: QTL corresponds to QTL in Supplementary Table 2, chr=chromosome, base=base position in chromosome, %V<sub>T</sub>=percent of total variation explained by SNP, P=p-value, %V<sub>G</sub>=percent of genetic variation explained by SNP, MiAC= Minor Allele Count = Number of founder chromosomes having minor allele represented in panel at this position, MaAC=Major Allele Count.
