# Supplementary material
Source: PubMed Central journal article supplement (PMC4174942)
Supplement: 17397f1c1be1a0fedc2dd0cd990c8a9c_genetics.114.161968-5.pdf [file 17397f1c1be1a0fedc2dd0cd990c8a9c_genetics.114.161968-5.pdf]

**Table S2 Candidate genes associated with QTL peaks of Figure XX and Table 1.**

| QTL                | Gene Name      | Chr | Left <sup>1</sup> | Right <sup>1</sup> | nsSNP <sup>2</sup> | SNPs <sup>2</sup> | TEs <sup>2,3</sup> |
|--------------------|----------------|-----|-------------------|--------------------|--------------------|-------------------|--------------------|
| <b>Carboplatin</b> |                |     |                   |                    |                    |                   |                    |
| CA1                | <i>CG9413</i>  | X   | 14477             | 14498              | 0                  | 280               | 1{A3}              |
| CA2                | <i>CG42271</i> | X   | 14122             | 14128              | 5                  | 48                |                    |
| CA3                | <i>na</i>      | X   | 14160             | 14172              | 1                  | 94                | 1{B7}              |
| CB1                | <i>MRP</i>     | 2L  | 12713             | 12760              | 15                 | 701               | 3{A6,B2,A3}        |
| CB2                | <i>spel1</i>   | 2L  | 14361             | 14378              | 11                 | 315               | 1{A6}              |
| <b>Gemcitabine</b> |                |     |                   |                    |                    |                   |                    |
| GA1                | <i>RnrS</i>    | 2R  | 7870              | 7874               | 3                  | 40                |                    |
| GB1                | <i>PHGPx</i>   | 3L  | 3322              | 3330               | 5                  | 151               |                    |

1. Method for determining Left and Right limits of candidate genes defined in Materials and Methods. Coordinates are given in kilobases.
2. Number of non-synonymous SNPs, other SNPs in the gene region, and transposable elements.
3. All transposable elements were only present in a single founder. Founder line harboring TE in {}.
