# Supplementary material
Source: PubMed Central journal article supplement (PMC4174942)
Supplement: ac3a84a3157029787de763bbef5a185f_genetics.114.161968-4.pdf [file ac3a84a3157029787de763bbef5a185f_genetics.114.161968-4.pdf]

A

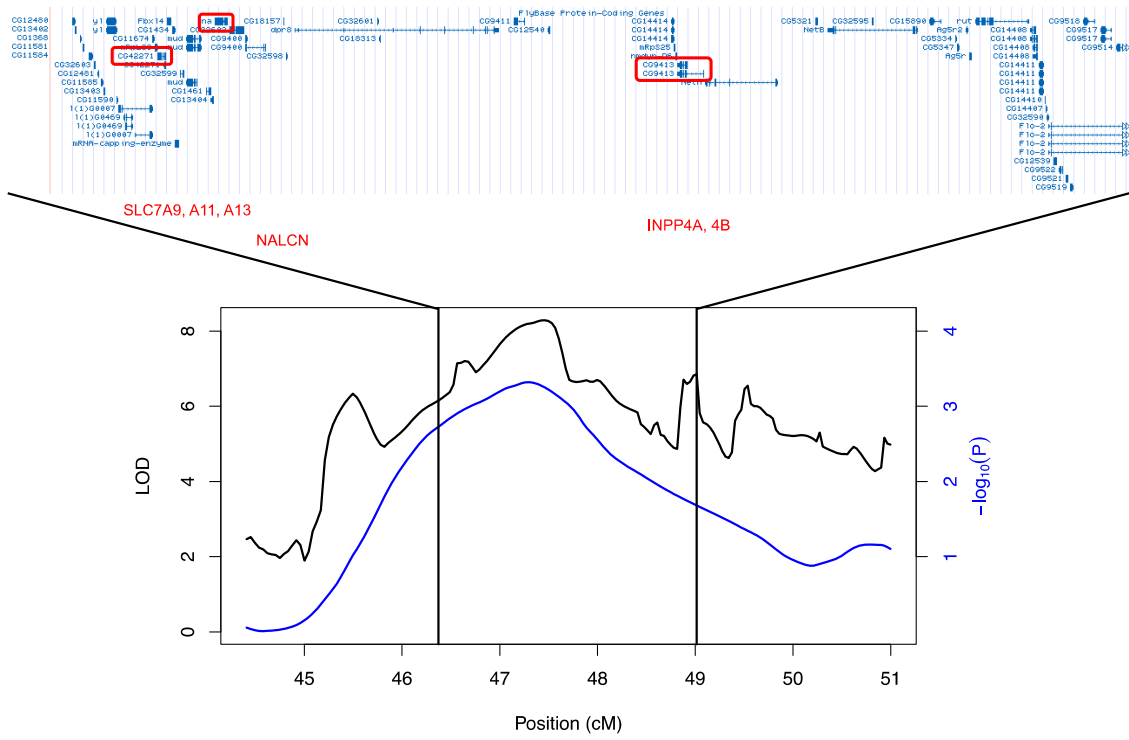



C

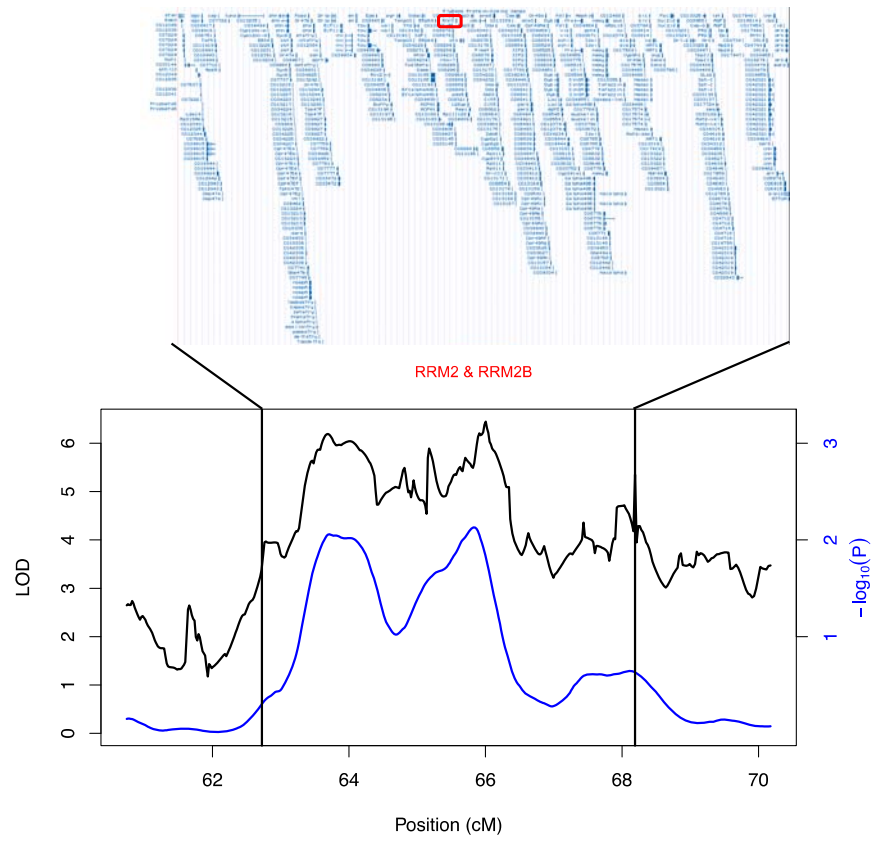

D

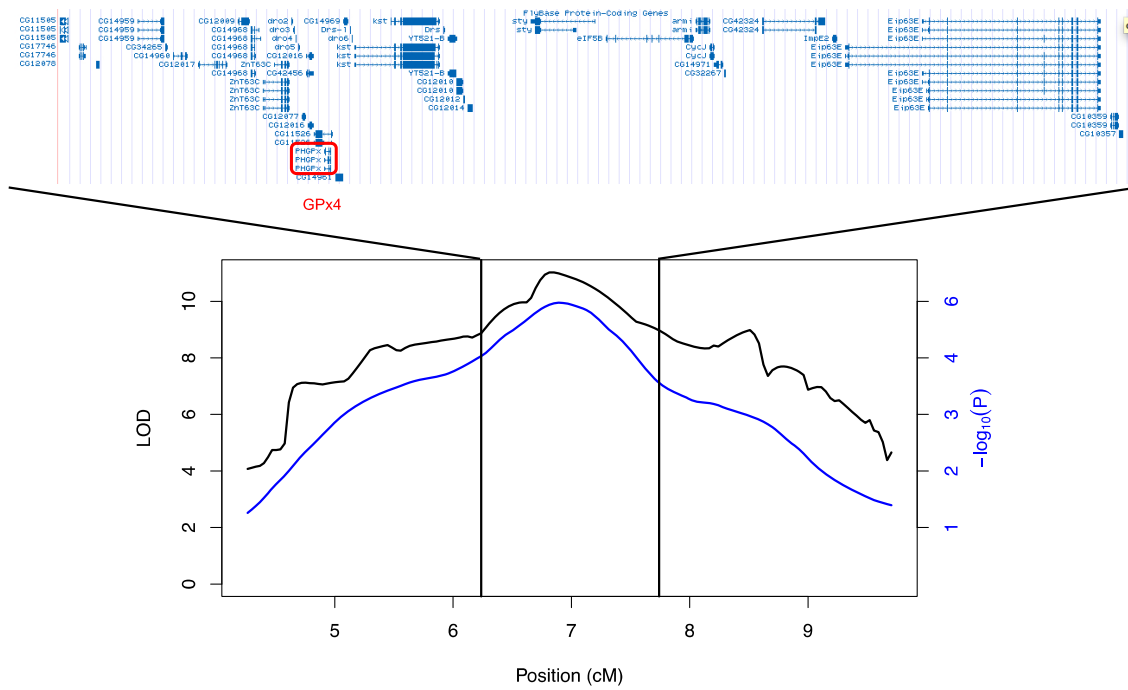

**Figure S2** Santa Cruz Genome Browser for the widest combined confidence interval (Table1) for QTLs A) CA, B) CB, C) GA, and D) GB. The *Drosophila* orthologs of possible human candidate genes are circled in red with the associated human gene name also in red.
