# Supplementary material
Source: PubMed Central journal article supplement (PMC4174942)
Supplement: cc8969b7f9a5defac74fa22ca49a36cd_genetics.114.161968-3.pdf [file cc8969b7f9a5defac74fa22ca49a36cd_genetics.114.161968-3.pdf]

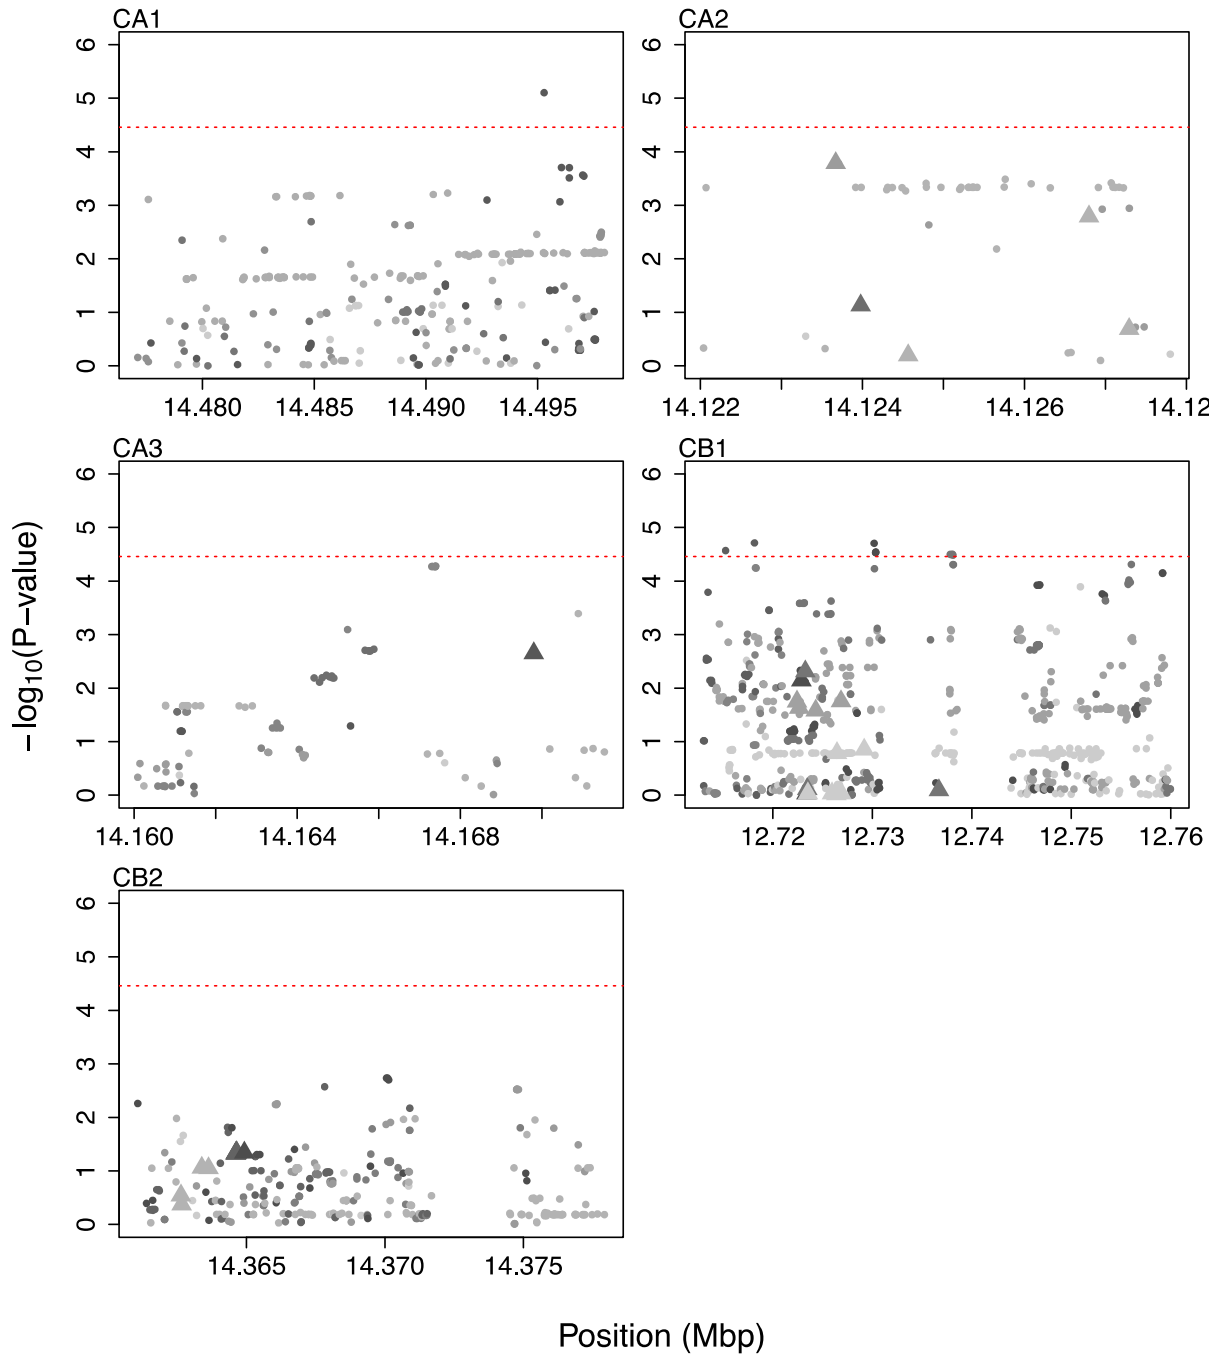

**Figure S3** Association scans with carboplatin toxicity for all SNPs in candidate genes listed in Table S2. Red threshold is the Bonferroni over all candidate gene regions for carboplatin. Symbols are shaded by the minor allele frequency in the founders such that darker circles are more common SNPs. Triangles are nsSNPs.
