# Supplementary material
Source: PubMed Central journal article supplement (PMC4174942)
Supplement: e95d6506d4d97eeb905890e7793ba4de_genetics.114.161968-7.pdf [file e95d6506d4d97eeb905890e7793ba4de_genetics.114.161968-7.pdf]

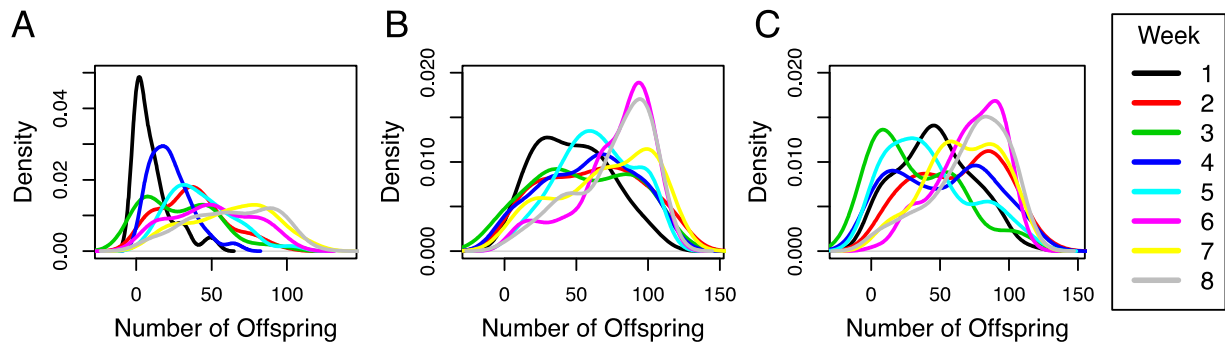

**Figure S1** Density plots of the mean number of offspring produced by the three replicate females from each RIL cross for A) carboplatin, B) gemcitabine, and C) mitomycin C. Different colors correspond to different weeks (blocks) of the experiment. In all three drugs weeks 6,7, and 8 were dropped because of too low knockdown. In addition, for carboplatin, weeks 1,3, and 4 were dropped because of too high knockdown. For mitomycin C, week 3 was dropped because of too high knockdown.
