# Supplementary material
Source: PubMed Central journal article supplement (PMC4174942)
Supplement: ec10e31c51f05c9eb4ac15c858e9cef9_genetics.114.161968-9.pdf [file ec10e31c51f05c9eb4ac15c858e9cef9_genetics.114.161968-9.pdf]

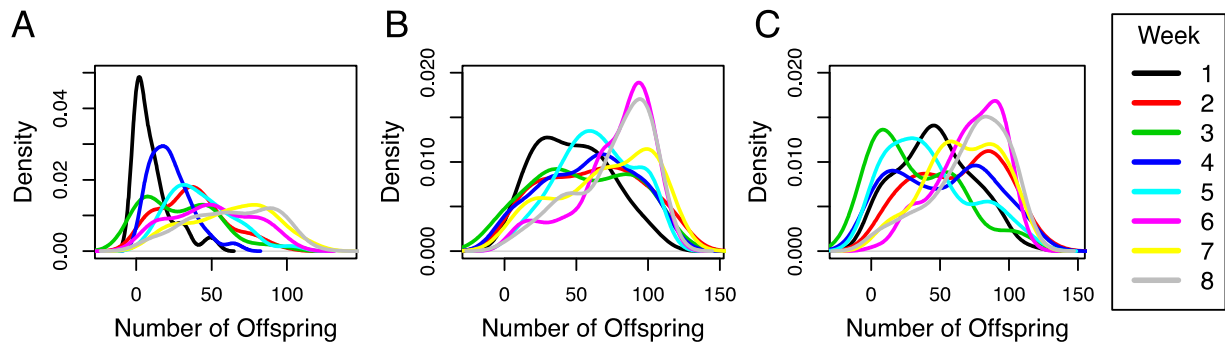

**Figure S1** Density plots of the mean number of offspring produced by the three replicate females from each RIL cross for A) carboplatin, B) gemcitabine, and C) mitomycin C. Different colors correspond to different weeks (blocks) of the experiment. In all three drugs weeks 6,7, and 8 were dropped because of too low knockdown. In addition, for carboplatin, weeks 1,3, and 4 were dropped because of too high knockdown. For mitomycin C, week 3 was dropped because of too high knockdown.

A

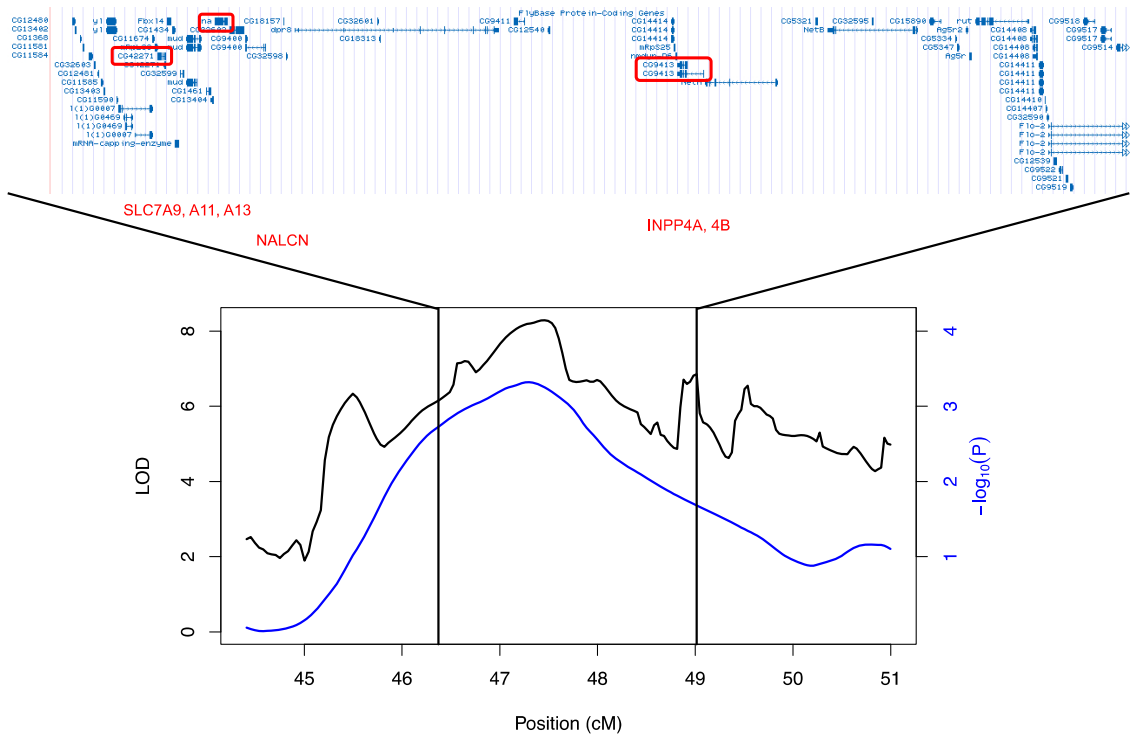

B

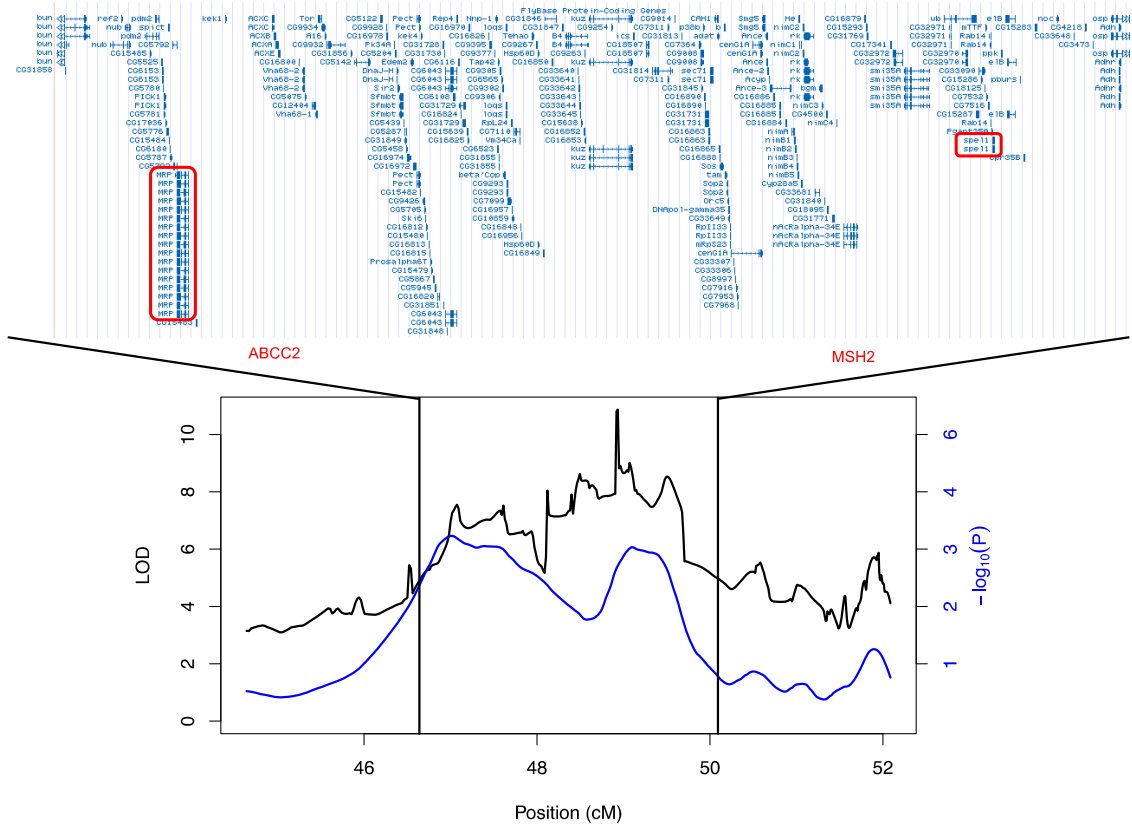

C

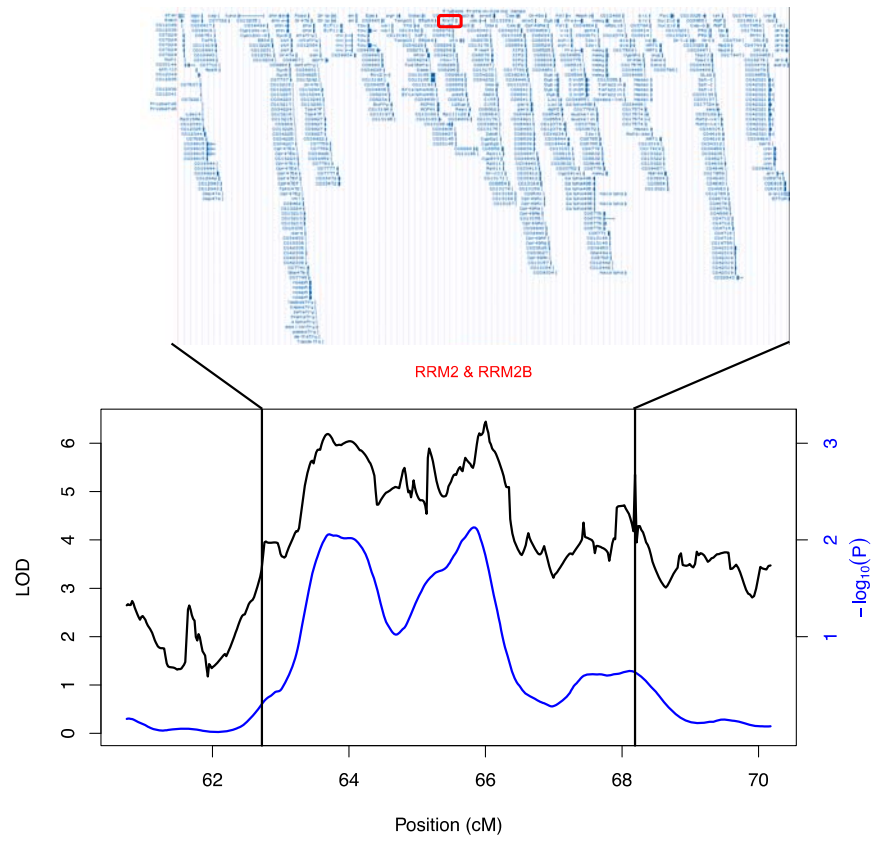

D

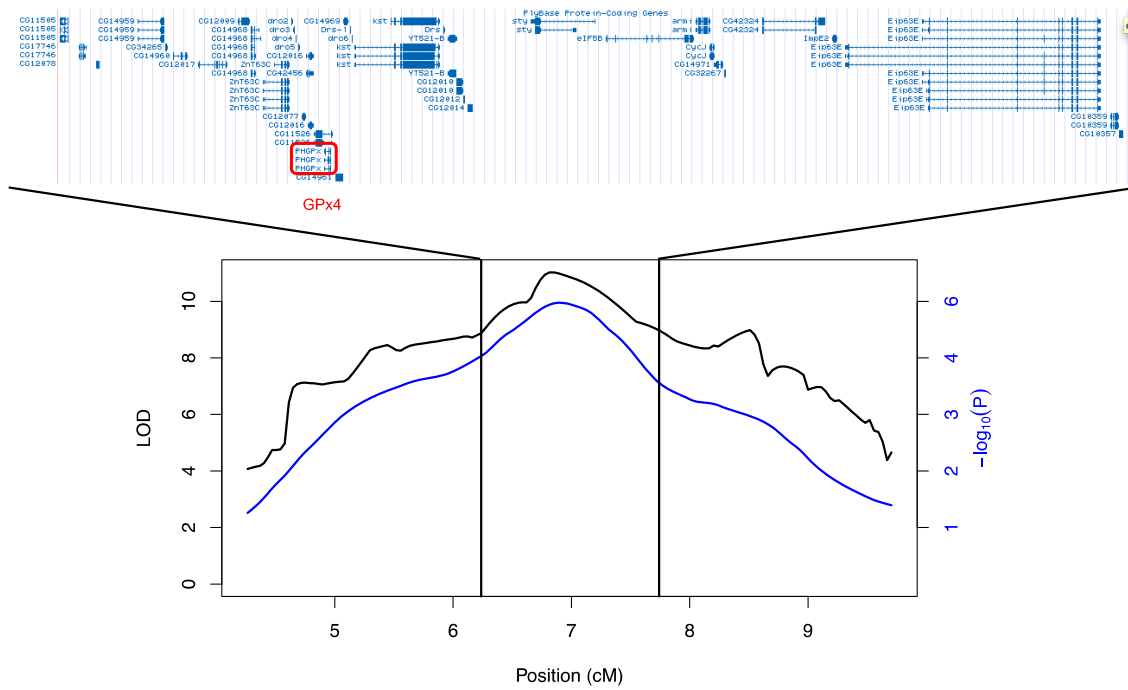

**Figure S2** Santa Cruz Genome Browser for the widest combined confidence interval (Table1) for QTLs A) CA, B) CB, C) GA, and D) GB. The *Drosophila* orthologs of possible human candidate genes are circled in red with the associated human gene name also in red.

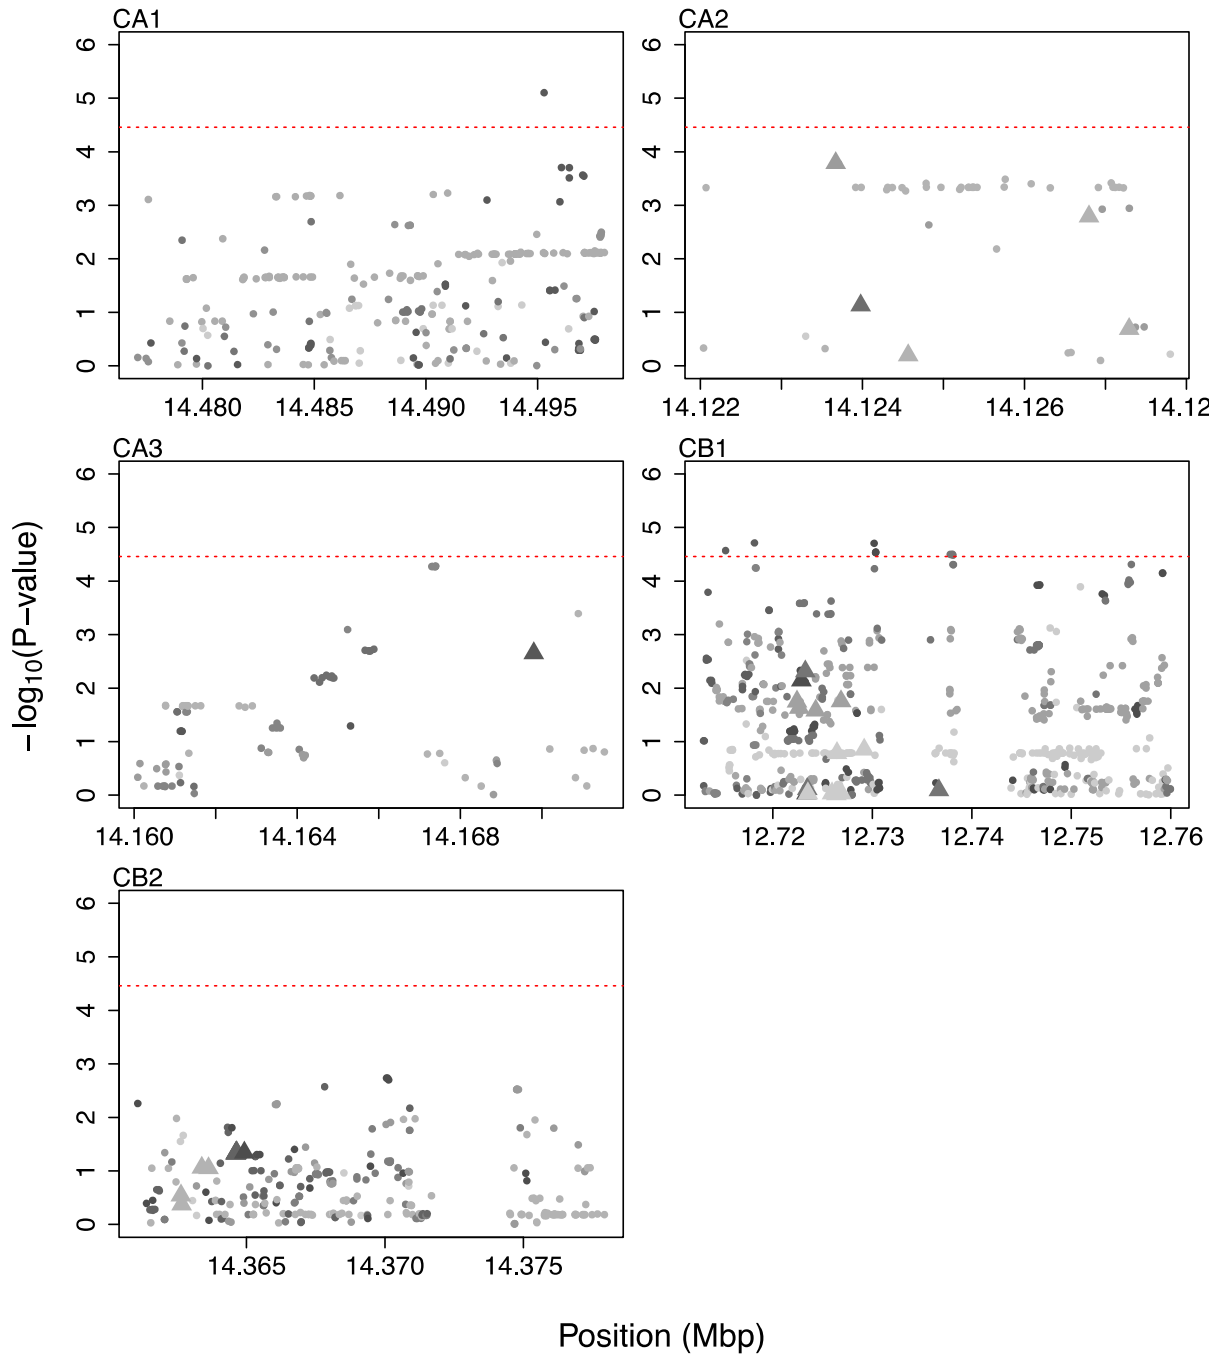

**Figure S3** Association scans with carboplatin toxicity for all SNPs in candidate genes listed in Table S2. Red threshold is the Bonferroni over all candidate gene regions for carboplatin. Symbols are shaded by the minor allele frequency in the founders such that darker circles are more common SNPs. Triangles are nsSNPs.

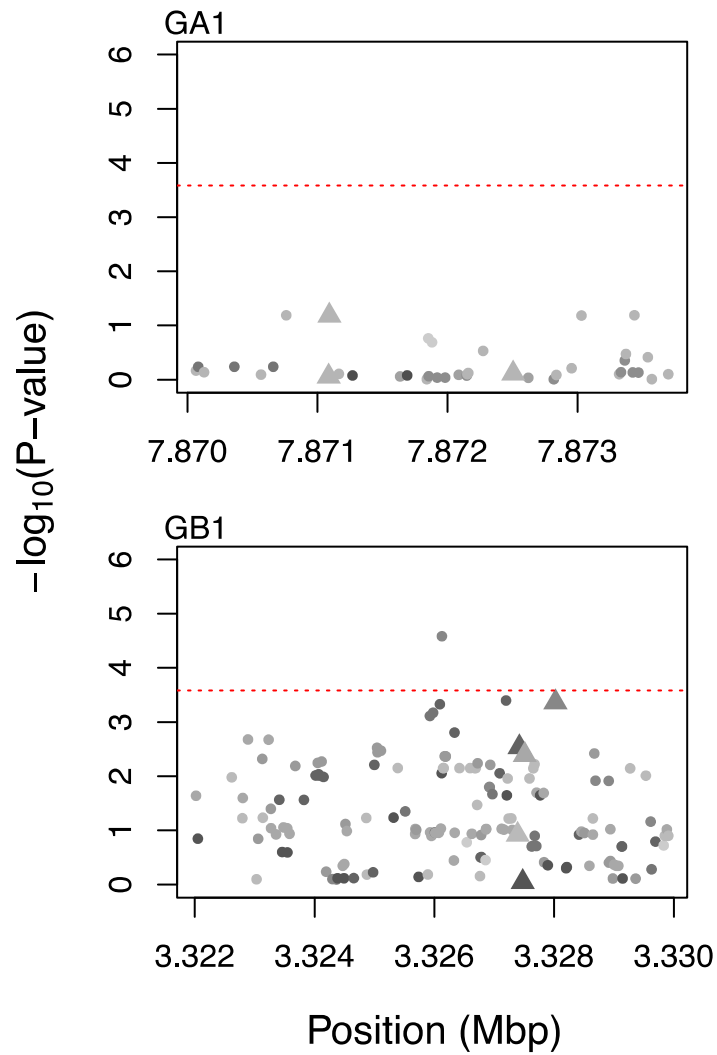

**Figure S4** Association scans with gemcitabine toxicity for all SNPs in candidate genes listed in Table S2. Red threshold is the Bonferroni over all candidate gene regions for gemcitabine. Symbols are shaded by the minor allele frequency in the founders such that darker circles are more common SNPs. Triangles are nsSNPs.

**Table S1 A priori identified Candidate Genes**

| <b>Carboplatin</b> |                                 |                                  |                                |                                                              |
|--------------------|---------------------------------|----------------------------------|--------------------------------|--------------------------------------------------------------|
| <b>Human Gene</b>  | <b>Polymorphism<sup>1</sup></b> | <b>Ortholog Type<sup>2</sup></b> | <b>Fly Gene(s)<sup>2</sup></b> | <b>References</b>                                            |
| ALDH1A1            | A1*2                            | 1:Many                           | Aldh-III                       | Ekhart <i>et al.</i> 2008                                    |
| ALDH3A1            | A1*2                            | Possible                         | CG31075                        | Ekhart, <i>et al.</i> 2008                                   |
| ERCC1              | C8092A                          | 1:1                              | Ercc1                          | Li <i>et al.</i> 2010                                        |
|                    | T118C                           |                                  |                                | Li <i>et al.</i> 2010; Steffensen <i>et al.</i> 2009         |
| ERCC2              | A35931C                         | 1:1                              | Xpd                            | Li <i>et al.</i> 2010                                        |
| GSTp1              | A342G                           | No Ortholog                      |                                | Sun <i>et al.</i> 2010                                       |
| hMSH2              | T6C                             | 1:1                              | spel1                          | Cheng <i>et al.</i> 2010                                     |
| hMLH1              | T1151A                          | 1:1                              | Mlh1                           | Cheng <i>et al.</i> 2010                                     |
| MRP2               | C24T                            | Possible                         | DI                             | Sun <i>et al.</i> 2010                                       |
| SLC31A1            | Pathway                         | 1:1                              | Ctr1A                          | Marsh <i>et al.</i> 2009                                     |
| ABCG2              | Pathway                         | Possible                         | bw                             | Marsh <i>et al.</i> 2009                                     |
|                    |                                 | Possible                         | st                             |                                                              |
|                    |                                 | Possible                         | w                              |                                                              |
| ABCC2              | Pathway                         | 1:Many                           | MRP                            | Marsh <i>et al.</i> 2009                                     |
| MT1A               | Pathway                         | No Ortholog                      |                                | Marsh <i>et al.</i> 2009                                     |
| MPO                | Pathway                         | Possible                         | Pxd                            | Marsh <i>et al.</i> 2009                                     |
|                    |                                 | Possible                         | CG10211                        |                                                              |
|                    |                                 | Possible                         | Irc                            |                                                              |
|                    |                                 | Possible                         | CG4009                         |                                                              |
|                    |                                 | Possible                         | CG5873                         |                                                              |
|                    |                                 | Possible                         | CG6969                         |                                                              |
|                    |                                 | Possible                         | CG42331                        |                                                              |
|                    |                                 | Possible                         | Pxt                            |                                                              |
| GSPT1              | Pathway                         | No Ortholog                      |                                | Marsh <i>et al.</i> 2009                                     |
| NQO1               | Pathway                         | No Ortholog                      |                                | Marsh <i>et al.</i> 2009                                     |
| GSTT1              | Pathway                         | Many:Many                        | CG1681                         | Marsh <i>et al.</i> 2009                                     |
|                    |                                 | Many:Many                        | CG1702                         |                                                              |
|                    |                                 | Many:Many                        | CG30000                        |                                                              |
|                    |                                 | Many:Many                        | CG30005                        |                                                              |
|                    |                                 | Possible                         | CG16936                        |                                                              |
|                    |                                 | Possible                         | CG11784                        |                                                              |
|                    |                                 | Possible                         | CG4688                         |                                                              |
|                    |                                 | Possible                         | CG5224                         |                                                              |
|                    |                                 | Possible                         | CG17639                        |                                                              |
|                    |                                 | Possible                         | gfzf                           |                                                              |
|                    |                                 | Function                         | GstD1-10 <sup>3</sup>          |                                                              |
|                    |                                 | Function                         | GstE1-10 <sup>3</sup>          |                                                              |
| MT2A               | Pathway                         | No Ortholog                      |                                | Marsh <i>et al.</i> 2009                                     |
| SOD1               | Pathway                         | No Ortholog                      |                                | Marsh <i>et al.</i> 2009                                     |
| GSTM1              | Pathway                         | No Ortholog                      |                                | Marsh <i>et al.</i> 2009                                     |
| ATP7A              | Pathway                         | 1:Many                           | ATP7                           | Marsh <i>et al.</i> 2009                                     |
| ATP7B              | Pathway                         | 1:Many                           | ATP7                           | Marsh <i>et al.</i> 2009                                     |
| HMGB1              | Pathway                         | No Ortholog                      |                                | Marsh <i>et al.</i> 2009                                     |
| POLH               | Pathway                         | 1:1                              | DNApol-eta                     | Marsh <i>et al.</i> 2009                                     |
| POLM               | Pathway                         | No Ortholog                      |                                | Marsh <i>et al.</i> 2009                                     |
| POLB               | Pathway                         | NoOrtholog                       |                                | Marsh <i>et al.</i> 2009                                     |
| REV3L              | Pathway                         | 1:Many                           | Mus205                         | Marsh <i>et al.</i> 2009                                     |
| MSH2               | Pathway                         | 1:1                              | spel1                          | Marsh <i>et al.</i> 2009                                     |
| MLH1               | Pathway                         | 1:1                              | Mlh1                           | Marsh <i>et al.</i> 2009                                     |
| MSH6               | Pathway                         | 1:1                              | Msh6                           | Marsh <i>et al.</i> 2009                                     |
| PMS2               | Pathway                         | 1:1                              | Pms2                           | Marsh <i>et al.</i> 2009                                     |
| ERCC1              | Pathway                         | 1:1                              | Ercc1                          | Marsh <i>et al.</i> 2009                                     |
| ERCC2              | Pathway                         | 1:1                              | Xpd                            | Marsh <i>et al.</i> 2009                                     |
| ERCC3              | Pathway                         | 1:1                              | Hay                            | Marsh <i>et al.</i> 2009                                     |
| ERCC4              | Pathway                         | 1:1                              | Mei-9                          | Marsh <i>et al.</i> 2009                                     |
| ERCC6              | Pathway                         | No Ortholog                      |                                | Marsh <i>et al.</i> 2009                                     |
| XRCC1              | Pathway                         | 1:Many                           | XRCC1                          | Marsh <i>et al.</i> 2009, Gurubhagavatula <i>et al.</i> 2004 |
| XPA                | Pathway                         | 1:1                              | Xpac                           | Marsh <i>et al.</i> 2009                                     |
| SNF                | Pathway                         | 1:1                              | CG8485                         | Marsh <i>et al.</i> 2009                                     |
| SWI                | Pathway                         | 1:Many                           | Iswi                           | Marsh <i>et al.</i> 2009                                     |
| <b>Gemcitabine</b> |                                 |                                  |                                |                                                              |
| <b>Human Gene</b>  | <b>Polymorphism<sup>1</sup></b> | <b>Ortholog Type<sup>2</sup></b> | <b>Fly Gene(s)<sup>2</sup></b> | <b>References</b>                                            |
| CDA                | A76C                            | 1:Many                           | CG8353                         | Tanaka <i>et al.</i> 2010                                    |



|         |                               |                        |                  |                                                                                                                                                                                                     |
|---------|-------------------------------|------------------------|------------------|-----------------------------------------------------------------------------------------------------------------------------------------------------------------------------------------------------|
|         | A79C                          |                        | CG8349           | Metharom <i>et al.</i> 2011;<br>Maring <i>et al.</i> 2010 ; Xu <i>et al.</i> 2012<br>Sugiyama <i>et al.</i> 2009;<br>Yonemori <i>et al.</i> 2005;<br>Ueno <i>et al.</i> 2009; Xu <i>et al.</i> 2012 |
|         | G208A                         |                        |                  | Tanaka <i>et al.</i> 2010<br>Si <i>et al.</i> 2011                                                                                                                                                  |
| dCK     | C(-1205)T<br>A9846G           | 1:Many                 | dnk              | Tanaka <i>et al.</i> 2010<br>Si <i>et al.</i> 2011                                                                                                                                                  |
| hCNT1   | G565A                         | Many:Many              | CG8083<br>CNT1   | Gusella <i>et al.</i> 2011                                                                                                                                                                          |
| hENT1   | A(-201)G<br>C913T<br>G(-706)C | 1:Many<br>Possible     | Ent1<br>Ent2     | Tanaka <i>et al.</i> 2010<br>Tanaka <i>et al.</i> 2010<br>Gusella <i>et al.</i> 2010                                                                                                                |
| MRP2    | G40A                          | Possible               | DI               | Tanaka <i>et al.</i> 2011                                                                                                                                                                           |
| MTHFR   | C677T                         | No Ortholog            |                  | Alberola <i>et al.</i> 2004; Hong 2013                                                                                                                                                              |
| RRM1    | A33G                          | 1:1                    | RnrL             | Tanaka <i>et al.</i> 2010                                                                                                                                                                           |
| SMYD3   | Knock-down                    | 1:Many                 | Bzd              | Kalari <i>et al.</i> 2010                                                                                                                                                                           |
| SLC29A1 | Pathway                       | 1:Many<br>Possible     | Ent1<br>Ent2     | Whirl-Carrillo <i>et al.</i> 2012                                                                                                                                                                   |
| SLC28A1 | Pathway                       | Many:Many<br>Many:Many | CG8083<br>CNT1   | Whirl-Carrillo <i>et al.</i> 2012                                                                                                                                                                   |
| SLC28A3 | Pathway                       | Many:Many<br>Many:Many | CG8083<br>CNT1   | Whirl-Carrillo <i>et al.</i> 2012                                                                                                                                                                   |
| CDA     | Pathway                       | 1:Many                 | CG8353<br>CG8349 | Whirl-Carrillo <i>et al.</i> 2012                                                                                                                                                                   |
| dCK     | Pathway                       | 1:Many                 | dnk              | Whirl-Carrillo <i>et al.</i> 2012                                                                                                                                                                   |
| NT5C    | Pathway                       | No Ortholog            |                  | Whirl-Carrillo <i>et al.</i> 2012                                                                                                                                                                   |
| CMPK1   | Pathway                       | 1:1                    | Dak1             | Whirl-Carrillo <i>et al.</i> 2012                                                                                                                                                                   |
| RRM1    | Pathway                       | 1:1                    | RnrL             | Whirl-Carrillo <i>et al.</i> 2012, Kwon <i>et al.</i> 2006                                                                                                                                          |
| RRM2    | Pathway                       | 1:Many                 | RnrS             | Whirl-Carrillo <i>et al.</i> 2012                                                                                                                                                                   |
| RRM2B   | Pathway                       | 1:Many                 | RnrS             | Whirl-Carrillo <i>et al.</i> 2012                                                                                                                                                                   |

| <b>Mitomycin C</b> |                                 |                                  |                                |                                                      |
|--------------------|---------------------------------|----------------------------------|--------------------------------|------------------------------------------------------|
| <b>Human Gene</b>  | <b>Polymorphism<sup>1</sup></b> | <b>Ortholog Type<sup>2</sup></b> | <b>Fly Gene(s)<sup>2</sup></b> | <b>References</b>                                    |
| FANCL              | Pathway                         | 1:1                              | Fancl                          | Zhang <i>et al.</i> 2006                             |
| FANCD2             | Pathway                         | 1:1                              | Fancd2                         | Roques <i>et al.</i> 2009, Ho <i>et al.</i> 2006     |
| Rad51              | Pathway                         | 1:1                              | spn-A                          | Ko <i>et al.</i> 2011                                |
| Mre11A             | Pathway                         | 1:1                              | Mre11                          | Roques <i>et al.</i> 2009                            |
| Rad50              | Pathway                         | 1:1                              | rad50                          | Roques <i>et al.</i> 2009,<br>Kim <i>et al.</i> 2002 |
| Nibrin             | Pathway                         | 1:1                              | nbs                            | Roques <i>et al.</i> 2009                            |
| CHK1               | Pathway                         | 1:1                              | grp                            | Boamah <i>et al.</i> 2010                            |

1. Polymorphism refers either to a SNP within a gene (SNP resulting in amino acid substitution given) or "pathway" indicates that the gene is in the drug's cellular pathway based on the literature (but that gene does not harbor a germ-line SNP impacting toxicity).
2. Ortholog types and gene names are represented as on the ensembl.org genome browser (Birney *et al.* 2004)
3. Gene family. The orthology prediction is based on both human and fly GST gene families having the same apparent biochemical function

**Table S2 Candidate genes associated with QTL peaks of Figure XX and Table 1.**

| QTL                | Gene Name      | Chr | Left <sup>1</sup> | Right <sup>1</sup> | nsSNP <sup>2</sup> | SNPs <sup>2</sup> | TEs <sup>2,3</sup> |
|--------------------|----------------|-----|-------------------|--------------------|--------------------|-------------------|--------------------|
| <b>Carboplatin</b> |                |     |                   |                    |                    |                   |                    |
| CA1                | <i>CG9413</i>  | X   | 14477             | 14498              | 0                  | 280               | 1{A3}              |
| CA2                | <i>CG42271</i> | X   | 14122             | 14128              | 5                  | 48                |                    |
| CA3                | <i>na</i>      | X   | 14160             | 14172              | 1                  | 94                | 1{B7}              |
| CB1                | <i>MRP</i>     | 2L  | 12713             | 12760              | 15                 | 701               | 3{A6,B2,A3}        |
| CB2                | <i>spel1</i>   | 2L  | 14361             | 14378              | 11                 | 315               | 1{A6}              |
| <b>Gemcitabine</b> |                |     |                   |                    |                    |                   |                    |
| GA1                | <i>RnrS</i>    | 2R  | 7870              | 7874               | 3                  | 40                |                    |
| GB1                | <i>PHGPx</i>   | 3L  | 3322              | 3330               | 5                  | 151               |                    |

1. Method for determining Left and Right limits of candidate genes defined in Materials and Methods. Coordinates are given in kilobases.
2. Number of non-synonymous SNPs, other SNPs in the gene region, and transposable elements.
3. All transposable elements were only present in a single founder. Founder line harboring TE in {}.

**Table S3 Biallelic SNPs significant after Bonferroni correction from gene-centric association scans.**

| QTL | chr | base     | %V <sub>T</sub> | P       | %V <sub>G</sub> | MiAC | MaAC |
|-----|-----|----------|-----------------|---------|-----------------|------|------|
| CA1 | X   | 14495288 | 10.3            | 7.9E-06 | 15.2            | 4    | 5    |
| CB1 | 2L  | 12715263 | 9.1             | 2.7E-05 | 13.5            | 3    | 4    |
| CB1 | 2L  | 12718169 | 9.5             | 1.9E-05 | 13.9            | 3    | 4    |
| CB1 | 2L  | 12730194 | 9.5             | 2.0E-05 | 13.9            | 3    | 3    |
| CB1 | 2L  | 12730331 | 9.1             | 2.9E-05 | 13.3            | 3    | 3    |
| CB1 | 2L  | 12730336 | 9.1             | 2.9E-05 | 13.3            | 3    | 3    |
| CB1 | 2L  | 12730358 | 9.1             | 2.9E-05 | 13.4            | 3    | 3    |
| CB1 | 2L  | 12737838 | 9.0             | 3.2E-05 | 13.2            | 2    | 4    |
| CB1 | 2L  | 12738050 | 9.0             | 3.1E-05 | 13.3            | 2    | 4    |
| CB1 | 2L  | 12738104 | 9.0             | 3.3E-05 | 13.2            | 2    | 4    |
| GB1 | 3L  | 3326126  | 4.3             | 2.6E-5  | 6.8             | 4    | 11   |

Note: QTL corresponds to QTL in Supplementary Table 2, chr=chromosome, base=base position in chromosome, %V<sub>T</sub>=percent of total variation explained by SNP, P=p-value, %V<sub>G</sub>=percent of genetic variation explained by SNP, MiAC= Minor Allele Count = Number of founder chromosomes having minor allele represented in panel at this position, MaAC=Major Allele Count.

**Table S4 Biallelic SNPs with p-values less than 0.01 for both gemcitabine toxicity and methotrexate toxicity within the GB1 candidate gene region (see Table S2).**

| chr | base    | GEM<br>%V <sub>T</sub> | MTX<br>%V <sub>T</sub> | GEM<br>P | MTX<br>P | GEM<br>%V <sub>G</sub> | MTX<br>%V <sub>G</sub> | GEM<br>MAF | MTX<br>MAF |
|-----|---------|------------------------|------------------------|----------|----------|------------------------|------------------------|------------|------------|
| 3L  | 3325388 | 1.8                    | 2.3                    | 0.007    | 0.008    | 2.8                    | 3.5                    | 6.7        | 7.1        |
| 3L  | 3326092 | 3.0                    | 2.3                    | 0.0005   | 0.008    | 4.7                    | 3.6                    | 40.0       | 57.1       |
| 3L  | 3326126 | 4.3                    | 2.2                    | 2.6E-05  | 0.01     | 6.8                    | 3.4                    | 26.7       | 28.5       |
| 3L  | 3326147 | 1.8                    | 2.3                    | 0.007    | 0.008    | 2.8                    | 3.5                    | 6.7        | 7.1        |
| 3L  | 3326157 | 1.8                    | 2.3                    | 0.007    | 0.008    | 2.8                    | 3.5                    | 6.7        | 7.1        |
| 3L  | 3326171 | 2.0                    | 2.9                    | 0.004    | 0.003    | 3.2                    | 4.5                    | 20.0       | 21.4       |
| 3L  | 3326188 | 2.0                    | 2.9                    | 0.004    | 0.003    | 3.2                    | 4.5                    | 20.0       | 21.4       |
| 3L  | 3326189 | 2.0                    | 2.9                    | 0.004    | 0.003    | 3.2                    | 4.5                    | 20.0       | 21.4       |
| 3L  | 3326419 | 1.8                    | 2.3                    | 0.007    | 0.008    | 2.8                    | 3.5                    | 6.7        | 7.1        |
| 3L  | 3326597 | 1.8                    | 2.3                    | 0.007    | 0.008    | 2.8                    | 3.5                    | 6.7        | 7.1        |
| 3L  | 3326672 | 1.8                    | 2.3                    | 0.007    | 0.008    | 2.8                    | 3.5                    | 6.7        | 7.1        |
| 3L  | 3326690 | 1.8                    | 2.3                    | 0.007    | 0.008    | 2.8                    | 3.5                    | 6.7        | 7.1        |
| 3L  | 3326933 | 1.8                    | 2.9                    | 0.006    | 0.003    | 2.9                    | 4.6                    | 20.0       | 21.4       |
| 3L  | 3327091 | 1.7                    | 2.5                    | 0.009    | 0.006    | 2.7                    | 3.8                    | 40.0       | 50.0       |
| 3L  | 3329269 | 1.8                    | 2.3                    | 0.007    | 0.008    | 2.8                    | 3.6                    | 6.7        | 7.1        |
| 3L  | 3329532 | 1.6                    | 2.3                    | 0.010    | 0.008    | 2.6                    | 3.6                    | 6.7        | 7.1        |

Note: chr=chromosome, base=base position in chromosome, GEM = gemcitabine, MTX = methotrexate, %V<sub>T</sub>=percent of total variation explained by SNP, P=p-value, %V<sub>G</sub>=percent of genetic variation explained by SNP, MAF = minor allele frequency= number of founder chromosomes having minor allele represented at this position/total number of founder chromosomes. Shaded rows are SNPs with p-values less than 0.001 for gemcitabine toxicity.

## References cited in Supporting Information

- ALBEROLA, V., C. SARRIES, R. ROSELL, M. TARON, R. PENAS et al., 2004 Effect of the methylenetetrahydrofolate reductase C677T polymorphism on patients with cisplatin/gemcitabine-treated stage IV non-small-cell lung cancer. *Clin Lung Cancer* 5: 360-365.
- BIRNEY, E., T. D. ANDREWS, P. BEVAN, M. CACCAMO, Y. CHEN et al., 2004 An overview of Ensembl. *Genome Res* 14: 925-928.
- BOAMAH, E. K., A. BREKMAN, M. TOMASZ, N. MYEKU, M. FIGUEIREDO-PEREIRA et al., 2010 DNA adducts of decarbamoyl mitomycin C efficiently kill cells without wild-type p53 resulting from proteasome-mediated degradation of checkpoint protein 1. *Chem Res Toxicol* 23: 1151-1162.
- EKHART, C., V. D. DOODEMAN, S. RODENHUIS, P. H. M. SMITS, J. H. BEIJNEN et al., 2008 Influence of polymorphisms of drug metabolizing enzymes (CYP2B6, CYP2C9, CYP2C19, CYP3A4, CYP3A5, GSTA1, GSTP1, ALDH1A1 and ALDH3A1) on the pharmacokinetics of cyclophosphamide and 4-hydroxycyclophosphamide. *Pharmacogenet Genomics* 18: 515-523.
- GURUBHAGAVATULA, S., G. LIU, S. PARK, W. ZHOU, L. SU et al., 2004 XPD and XRCC1 genetic polymorphisms are prognostic factors in advanced non-small-cell lung cancer patients treated with platinum chemotherapy. *J Clin Oncol* 22: 2594-2601.
- GUSELLA, M., F. PASINI, C. BOLZONELLA, S. MENEGHETTI, C. BARILE et al., 2011 Equilibrative nucleoside transporter 1 genotype, cytidine deaminase activity and age predict gemcitabine plasma clearance in patients with solid tumours. *Br J Clin Pharmacol* 71: 437-444.
- HO, G. P. H., S. MARGOSSIAN, T. TANIGUCHI and A. D. D'ANDREA, 2006 Phosphorylation of FANCD2 on two novel sites is required for mitomycin C resistance. *Molecular and Cellular Biology* 26: 7005-7015.
- HONG, W., K. WANG, Y.-P. ZHANG, J.-Y. KOU, D. HONG et al., 2013 Methylenetetrahydrofolate reductase C677T polymorphism predicts response and time to progression to gemcitabine-based chemotherapy for advanced non-small cell lung cancer in a Chinese Han population. *J Zhejiang Univ Sci B* 14: 207-215.
- KALARI, K. R., S. J. HEBBRING, H. S. CHAI, L. LI, J.-P. A. KOCHER et al., 2010 Copy number variation and cytidine analogue cytotoxicity: a genome-wide association approach. *BMC Genomics* 11: 357.
- KIM, Y., J. KOH, B. SHIN, K. AHN, B. CHOI et al., 2002 An antisense construct of full-length human RAD50 cDNA confers sensitivity to ionizing radiation and alkylating agents on human cell lines. *Radiat Res* 157: 19-25.
- KO, J.-C., M.-S. TSAI, S.-H. WENG, Y.-H. KUO, Y.-F. CHIU et al., 2011 Curcumin enhances the mitomycin C-induced cytotoxicity via downregulation of MKK1/2-ERK1/2-mediated Rad51 expression in non-small cell lung cancer cells. *Toxicol Appl Pharmacol* 255: 327-338.
- KWON, W. S., S. Y. RHA, Y. H. CHOI, J. O. LEE, K. H. PARK et al., 2006 Ribonucleotide reductase M1 (RRM1) 2464G>A polymorphism shows an association with gemcitabine chemosensitivity in cancer cell lines. *Pharmacogenet Genomics* 16: 429-438.
- LI, H., H. SHI, H. WANG, Z. ZHU, X. LI et al., 2010 Crystal structure of the two N-terminal RRM domains of Pub1 and the poly(U)-binding properties of Pub1. *J Struct Biol* 171: 291-297.
- MARING, J. G., F. M. WACHERS, M. SLIJFER, J. M. MAURER, H. M. BOEZEN et al., 2010 Pharmacokinetics of gemcitabine in non-small-cell lung cancer patients: impact of the 79A>C cytidine deaminase polymorphism. *Eur J Clin Pharmacol* 66: 611-617.
- METHAROM, E., P. GALETTIS, S. MANNERS, M. JELINEK, W. LIAUW et al., 2011 The pharmacological advantage of prolonged dose rate gemcitabine is restricted to patients with variant alleles of cytidine deaminase c.79A>C. *Asia Pac J Clin Oncol* 7: 65-74.
- ROQUES, C., Y. COULOMBE, M. DELANNOY, J. VIGNARD, S. GROSSI et al., 2009 MRE11-RAD50-NBS1 is a critical regulator of FANCD2 stability and function during DNA double-strand break repair. *EMBO J* 28: 2400-2413.

- SI, S., Q. LIAO, Y. ZHAO, Y. HU, Q. ZHANG et al., 2011 Relationship between single nucleotide polymorphisms in the deoxycytidine kinase gene and chemosensitivity of gemcitabine in six pancreatic cancer cell lines. *Chin Med J (Engl)* 124: 419-422.
- STEFFENSEN, K. D., M. WALDSTRØM and A. JAKOBSEN, 2009 The relationship of platinum resistance and ERCC1 protein expression in epithelial ovarian cancer. *Int J Gynecol Cancer* 19: 820-825.
- SUGIYAMA, E., S.-J. LEE, S. S. LEE, W.-Y. KIM, S.-R. KIM et al., 2009 Ethnic differences of two non-synonymous single nucleotide polymorphisms in CDA gene. *Drug Metab Pharmacokinet* 24: 553-556.
- SUN, L., S. WANG, C. HU and X. ZHANG, 2010 Regulation of cell proliferation and apoptosis through fibrocystin-prosaposin interaction. *Arch Biochem Biophys* 502: 130-136.
- TANAKA, M., M. JAVLE, X. DONG, C. ENG, J. L. ABBRUZZESE et al., 2010 Gemcitabine metabolic and transporter gene polymorphisms are associated with drug toxicity and efficacy in patients with locally advanced pancreatic cancer. *Cancer* 116: 5325-5335.
- TANAKA, M., T. OKAZAKI, H. SUZUKI, J. L. ABBRUZZESE and D. LI, 2011 Association of multi-drug resistance gene polymorphisms with pancreatic cancer outcome. *Cancer* 117: 744-751.
- UENO, H., N. KANIWA, T. OKUSAKA, M. IKEDA, C. MORIZANE et al., 2009 Homozygous CDA\*3 is a major cause of life-threatening toxicities in gemcitabine-treated Japanese cancer patients. *Br J Cancer* 100: 870-873.
- XU, J., Y. ZHOU, J. ZHANG, Y. CHEN, R. ZHUANG et al., 2012 High incidence of severe neutropenia after gemcitabine-based chemotherapy in Chinese cancer patients with CDA 79A>C mutation. *Clin Chim Acta* 413: 1284-1287.
- YONEMORI, K., H. UENO, T. OKUSAKA, N. YAMAMOTO, M. IKEDA et al., 2005 Severe drug toxicity associated with a single-nucleotide polymorphism of the cytidine deaminase gene in a Japanese cancer patient treated with gemcitabine plus cisplatin. *Clin Cancer Res* 11: 2620-2624.
- ZHANG, J., X. WANG, C.-J. LIN, F. J. COUCH and P. FEI, 2006 Altered expression of FANCL confers mitomycin C sensitivity in Calu-6 lung cancer cells. *Cancer Biol Ther* 5: 1632-1636.
